# Supplementary material
Source: PubMed Central journal article supplement (PMC6989802)
Supplement: JB.00592-19-s0001.pdf [file JB.00592-19-s0001.pdf]

**Supplementary Information for:**

***In situ* structure of the *Vibrio* polar flagellum reveals distinct outer membrane complex and its specific interaction with the stator**

Shiwei Zhu<sup>1,2,†</sup>, Tatsuro Nishikino<sup>3</sup>, Norihiro Takekawa<sup>4</sup>, Hiroyuki Terashima<sup>3</sup>, Seiji Kojima<sup>3</sup>, Katsumi Imada<sup>4</sup>, Michio Homma<sup>3,#</sup>, Jun Liu<sup>1,2,#</sup>

<sup>1</sup> Department of Microbial Pathogenesis, Yale University, New Haven, Connecticut, USA.

<sup>2</sup> Microbial Sciences Institute, Yale University, West Haven, Connecticut, USA.

<sup>3</sup> Division of Biological Science, Graduate School of Science, Nagoya University, Furo-cho, Chikusa-ku, Nagoya 464-8602, Japan

<sup>4</sup>Department of Macromolecular Science, Graduate School of Science, Osaka University, 1-1 Machikaneyama-cho, Toyonaka, Osaka 560-0043, Japan

†Present address: Howard Hughes Medical Institute, Yale University School of Medicine, New Haven, Connecticut, USA.

#To whom correspondence may be addressed.

Email. g44416a@cc.nagoya-u.ac.jp or jliu@yale.edu

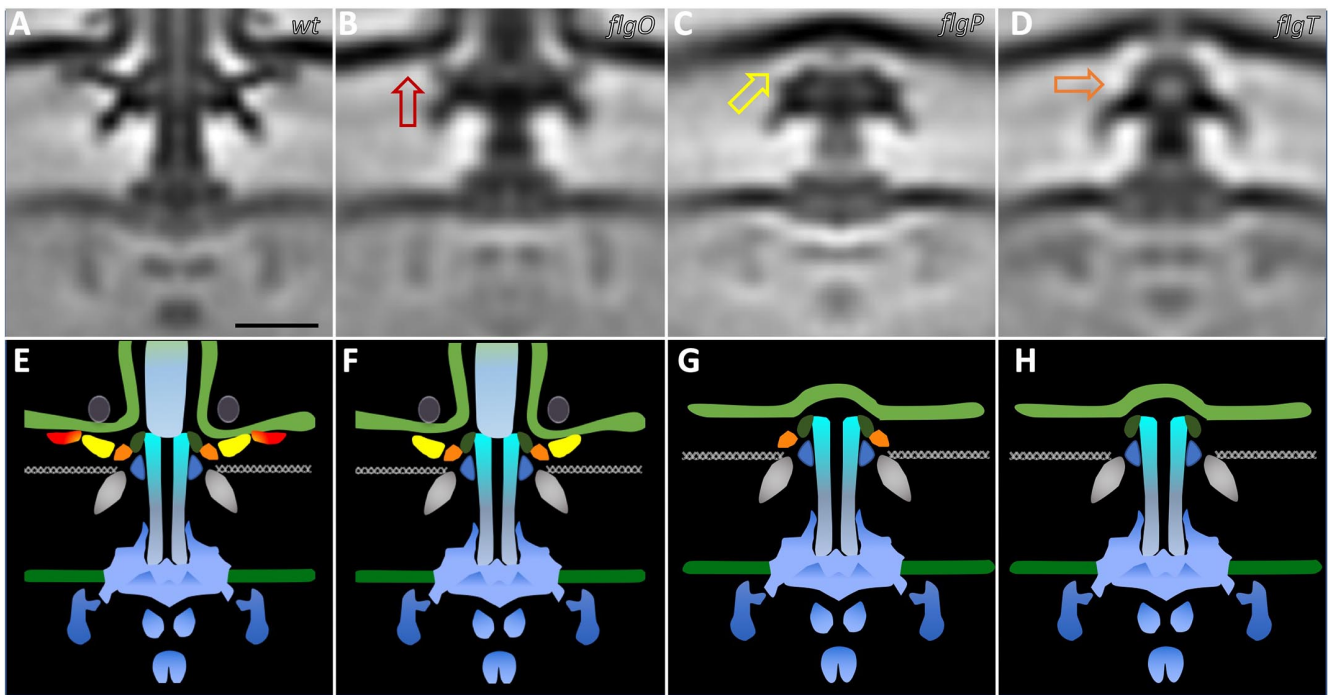

**Fig. S1.** Characterization of the H-ring components. (A~D) A 2D slice of sub-tomogram averaged structure of the top part of *Vibrio* motor in KK148-*wt*, KK148- $\Delta$ *flgO* (NMB337), *Vibrio fischeri*  $\Delta$ *flgP* (EMDB-3162) and KK148- $\Delta$ *flgT* (TH7). (E~H) The cartoon models of (A~D). Bar is 20 nm.

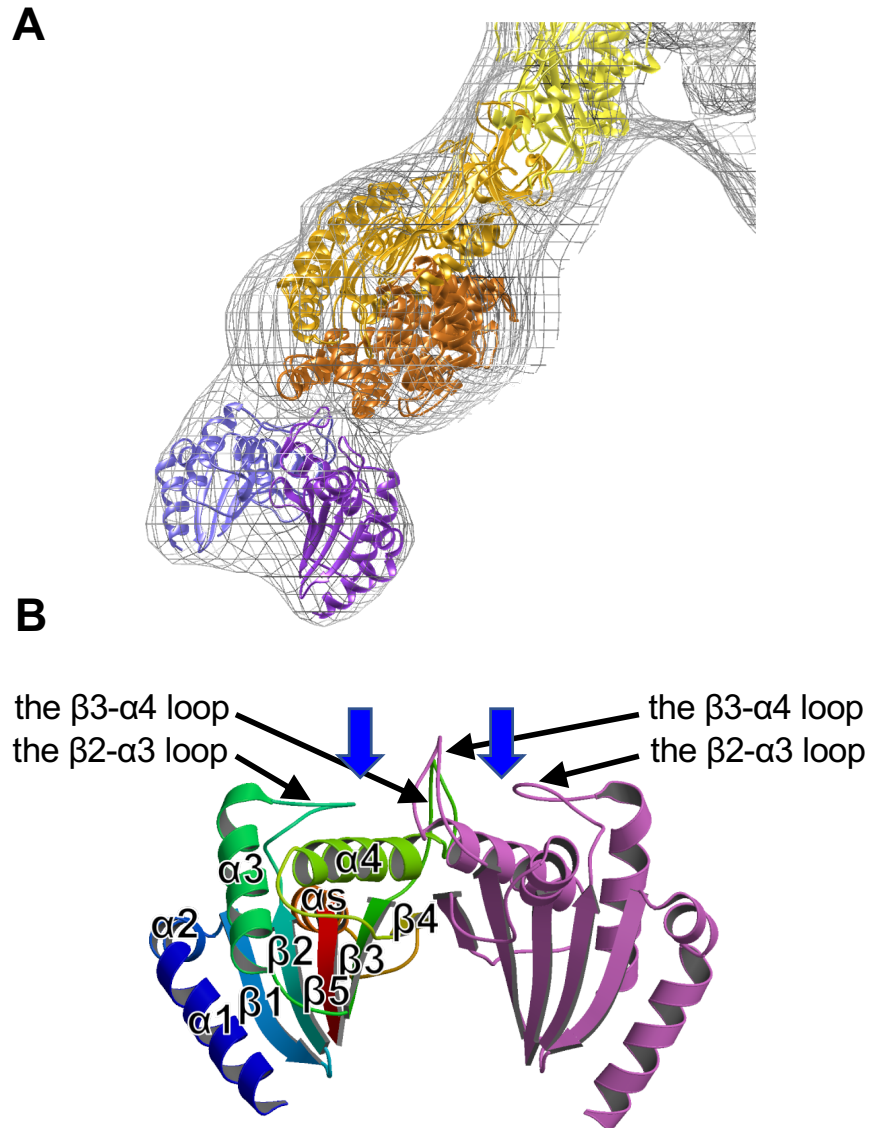

**Fig. S2.** (A) Enlarged figure of Fig. 3F. (B) The ribbon diagram of the atomic model of PomB<sub>C</sub> as a dimer (PDB ID:3WPW). The putative peptidoglycan binding sites previously suggested and the loop structures included in the binding sites are indicated by blue and black arrows, respectively.

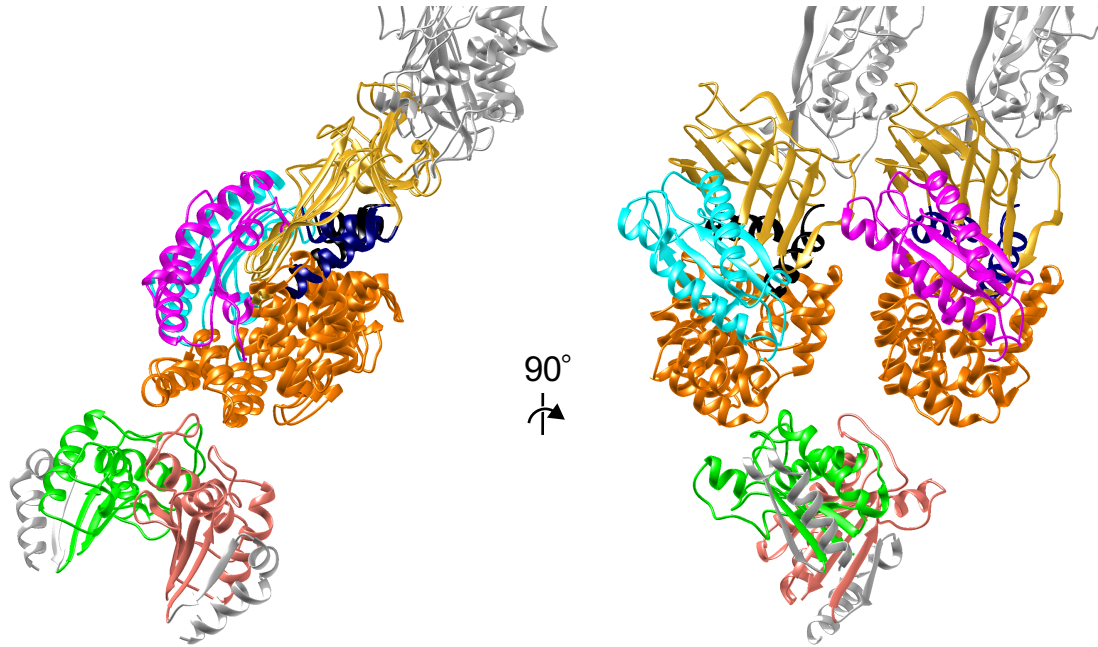

**Fig. S3.** The putative location of PG-binding motif of PomB and of MotY  $\alpha$ -helices which is close to MotX. The figure was enlarged from Fig. 3E and 3F and to give the colors which are magenta and cyan for PG-binding motifs of adjacent MotY, which are navy blue and black for  $\alpha$ -helices of MotY located near MotX, or which are green and coral for PG-binding motifs of PomB dimer.

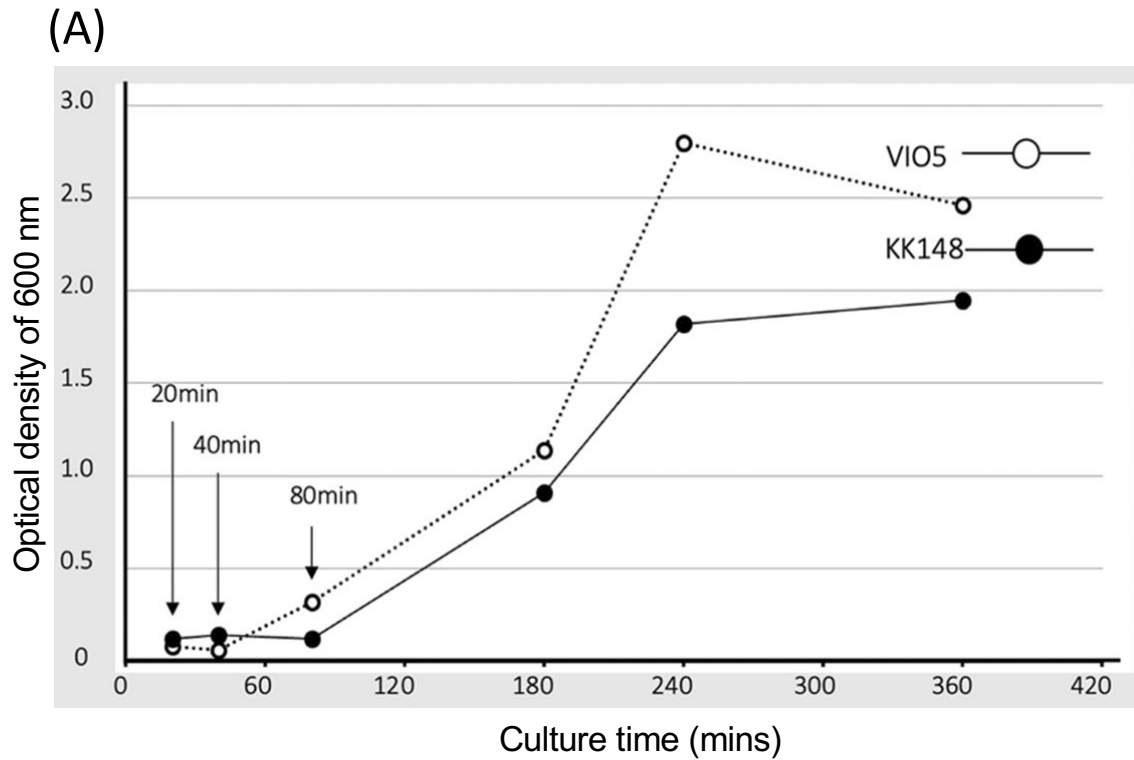

(B)

| Time resolved data | State1 | State2 | State3 | State4 |
|--------------------|--------|--------|--------|--------|
| 20 mins            | 4      | 1      | 0      | 0      |
| 40 mins            | 3      | 2      | 6      | 4      |

**Fig. S4.** (A) Growth curve comparison between single polar flagellated strain VIO5 and hyper-polar flagellated strain on time-coursed cryo-ET. (B) The number of the states observed time-coursed cryo-ET during flagellar assembly.

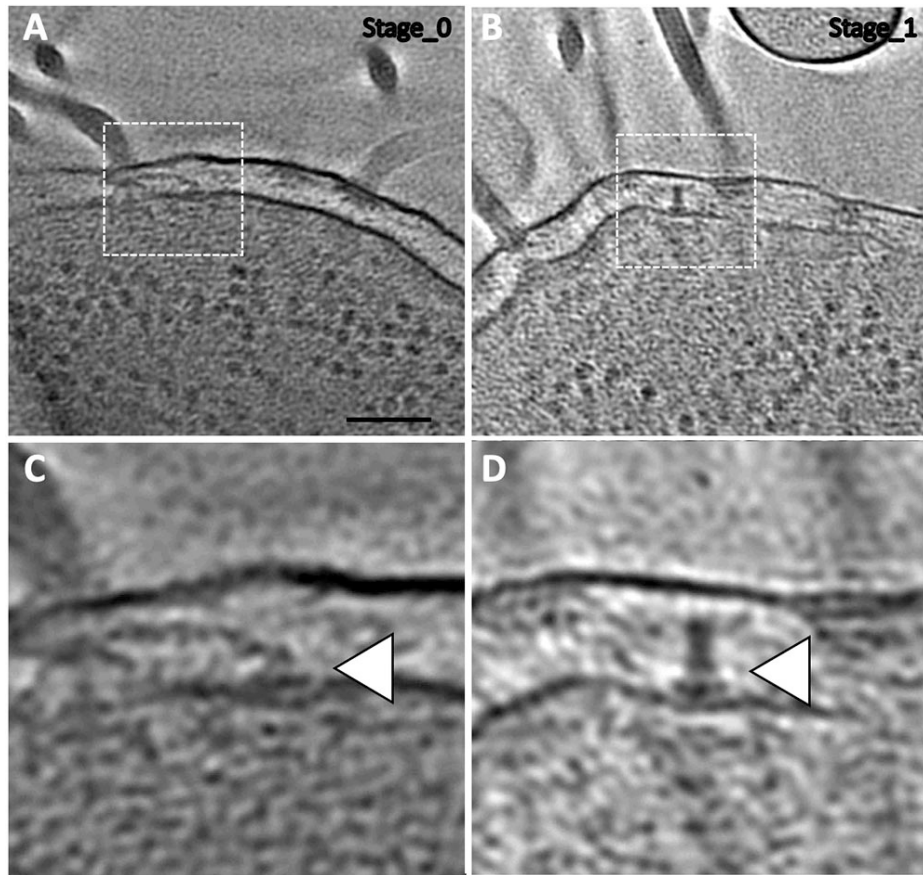

**Fig. S5.** Capturing initial state of flagellar assembly. (A) MS/C-rings together with export apparatus are visible in raw-tomograms. (B) Intermediated state assembled with MS/C-rings, export apparatus together with the flagellar rod is visible. (C, D) A zoom-in the view of squared area in (A) and (B).
